1 **Transcriptional landscape of soybean (*Glycine max*) embryonic axes during**  
2 **germination in the presence of paclobutrazol, a gibberellin biosynthesis inhibitor**

3 Rajesh K. Gazara<sup>1,#</sup>, Eduardo A. G. de Oliveira<sup>1,#</sup>, Antônia Elenir A. Oliveira<sup>1</sup> and Thiago M.  
4 Venancio<sup>1,\*</sup>

5 <sup>1</sup>Laboratório de Química e Função de Proteínas e Peptídeos, Centro de Biociências e Biotecnologia,  
6 Universidade Estadual do Norte Fluminense Darcy Ribeiro; Campos dos Goytacazes, Brazil. #These  
7 authors contributed equally to this work.  
8

9 \* Corresponding author

10 Av. Alberto Lamego 2000 / P5 / 217; Parque Califórnia

11 Campos dos Goytacazes, RJ

12 Brazil

13 CEP: 28013-602

14 [thiago.venancio@gmail.com](mailto:thiago.venancio@gmail.com)

15

16

17 **Declarations of interest:** none.

18

## 19 **ABSTRACT**

20 Gibberellins (GA) are key positive regulators of seed germination. Although the GA effects on  
21 seed germination have been studied in a number of species, little is known about the  
22 transcriptional reprogramming modulated by GA during this phase in species other than  
23 *Arabidopsis thaliana*. Here we report the transcriptome analysis of soybean embryonic axes  
24 during germination in the presence of paclobutrazol (PBZ), a GA biosynthesis inhibitor. We  
25 found a number of differentially expressed cell wall metabolism genes, supporting their roles in  
26 cell expansion during germination. Several genes involved in the biosynthesis and signaling of  
27 other phytohormones were also modulated, indicating an intensive hormonal crosstalk at the  
28 embryonic axis. We have also found 26 photosynthesis genes that are up-regulated by PBZ at  
29 24 hours of imbibition (HAI) and down-regulated at 36 HAI, which led us to suggest that this is  
30 part of a strategy to implement an autotrophic growth program in the absence of GA-driven  
31 mobilization of reserves. Finally, 30 transcription factors (mostly from the MYB, bHLH and bZIP  
32 families) that are down-regulated by PBZ and are likely downstream GA targets that will drive  
33 transcriptional changes during germination.

34

35 **Keywords:** gibberellin, transcriptome, germination, soybean, paclobutrazol.

36

37

## 38 **INTRODUCTION**

39 Gibberellins (GAs) constitute a large family of diterpenoid compounds that are  
40 ubiquitous in higher plants. Some GAs regulate processes such as seed germination, root and  
41 stem elongation, leaf expansion, flower and fruit development [1, 2]. Seed germination typically  
42 starts with imbibition and ends with testa rupture, followed by emergence of the embryonic  
43 axis [3]. During this relatively short period, metabolic activity resumes, mitochondria and DNA  
44 damaged during desiccation are repaired, stored mRNAs are translated or degraded and new  
45 transcriptional programs are activated. This complex series of interconnected events is fueled  
46 by the mobilization of stored reserves and gradually shifts towards photosynthesis and  
47 autotrophic growth [4-6].

48 Over the past decades, seminal studies unequivocally demonstrated the role of GA in  
49 promoting seed germination [7], in particular because GA-deficient mutants (e.g. *ga1-3* and  
50 *ga2-1*) often require exogenous GA to germinate [8, 9]. Further, the inhibition of radicle  
51 emergence in the presence of GA biosynthesis inhibitors (e.g. uniconazole and paclobutrazol,  
52 PBZ) indicates that GA is essential for seed germination [10-12]. PBZ is a plant growth retardant  
53 that blocks GA biosynthesis by inhibiting kaurene oxidase [13]. Other key GA biosynthesis  
54 enzymes are GA20- and GA3-oxidases (GA20ox and GA3ox, respectively), whereas GA2-  
55 oxidases (GA2ox) inactivate GA. During late germination, GA is synthesized at the radicle,  
56 hypocotyls and micropylar endosperm [14]. GA is recognized by soluble receptors of the  
57 GIBBERELLIN INSENSITIVE DWARF1 (GID1) family [15], which comprises the subfamilies GID1ac  
58 and GID1b in eudicots. Although very similar at the primary sequence level, different lines of  
59 evidence indicate that these subfamilies are functionally divergent [2, 16, 17]. The GA–GID1  
60 complex promotes the degradation of DELLA transcriptional repressors via the 26S proteasome  
61 pathway [18]. Further, enhanced germination has been reported in loss-of-function DELLA-  
62 mutants [19]. GA is also notorious for its antagonistic interactions with ABA, a well-known seed  
63 germination inhibitor. In addition, GA has also been proposed to positively interact with  
64 brassinosteroids (BRs) and ethylene, which are ABA antagonists during seed germination [19-  
65 21].

66 During seed germination, GA enhances embryo growth by promoting cell elongation and  
67 weakening of the surrounding tissues [14, 19]. Several genes regulated by GA or DELLA have  
68 been identified during *Arabidopsis* seed germination, seedling and floral development [14, 22-  
69 24]. In addition, various genes related to hormone pathways and cell wall metabolism were  
70 modulated by GA [14, 22]. Despite the valuable information accumulated on the biochemical  
71 details of GA signaling and interactions with other hormones, little is known about the  
72 transcriptional programs driven by GA in germinating seeds of species other than *A. thaliana*.  
73 To date, only one report investigated the transcriptome of embryonic axes during soybean  
74 (*Glycine max*) germination [25]. Although this study showed a conspicuous activation of GA  
75 biosynthesis genes, it does not allow one to distinguish GA-driven transcriptional alterations. In  
76 the present work, we report the transcriptome of soybean embryonic axes during seed

77 germination in the presence of the GA biosynthesis inhibitor PBZ, aiming to uncover the genes  
78 that are regulated by GA. We show that PBZ: 1) up-regulates several photosynthesis genes; 2)  
79 modulates the expression of numerous genes involved in the biosynthesis, signaling and  
80 transport of other hormones, suggesting an intensive hormonal cross-talk during germination;  
81 3) modulates the expression of several genes encoding cell wall modifying enzymes, supporting  
82 their roles in embryo cell expansion during germination and; 4) represses several transcription  
83 factors (TFs) in a time-specific fashion, indicating that these TFs might drive the transcriptional  
84 reprogramming mediated by GA during germination.

85

## 86 **RESULTS AND DISCUSSION**

### 87 **Transcriptome sequencing and functional analysis of differentially expressed genes**

88 We conducted an initial assay to investigate the effects of PBZ on soybean seed  
89 germination. As expected, PBZ administration reduced radicle length, fresh weight and dry  
90 weight, resulting in a delay in germination (Supplementary figure S1). Embryonic axes at 12, 24  
91 and 36 hours after imbibition (HAI) were carefully separated from the cotyledons and  
92 submitted to RNA extraction, library preparation and sequencing on an Illumina HiSeq 2500  
93 instrument (see methods for details). A total of 18 libraries (three biological replicates, with or  
94 without PBZ) were sequenced, resulting in a total of 14 to 67 million reads per sample  
95 (Supplementary table S1). High-quality reads were mapped to the soybean reference genome  
96 (Wm82.a2.v1) and used for downstream analysis. Overall, 97.2% of the reads mapped to the  
97 reference genome (Supplementary table S1). In general, we found good correspondence  
98 between the biological replicates (Supplementary figure S2) and high pair-wise correlations  
99 (0.95 to 0.99) (Supplementary table S2). Genes with RPKM (Reads Per Kilobase per Million  
100 mapped reads) greater than or equal to 1 were considered expressed. In total, 29,204, 29,467,  
101 31,065, 30,887, 32,636 and 32,466 genes were found to be expressed in 12C (control), 12P  
102 (PBZ), 24C, 24P, 36C and 36P, respectively (Figure 1A). Approximately 62.43% of the soybean  
103 protein-coding genes (34,990 genes) were expressed in at least at one time point  
104 (Supplementary table S3), which is comparable to a previously published soybean germination  
105 transcriptome [25].

106 We compared the transcriptional profiles of PBZ-treated seeds at each time point with  
107 their respective controls and found a total of 85, 486 and 307 differentially expressed genes  
108 (DEGs) at 12, 24 and 36 HAI, respectively (Supplementary table S4). Because PBZ is a GA  
109 antagonist, PBZ down- and up-regulated genes (i.e. PBZ-down and PBZ-up, respectively) are  
110 likely those induced and repressed by GA. The absolute number of genes down-regulated by  
111 PBZ and their ratios to up-regulated genes increased along germination (Figure 1B;  
112 Supplementary table S4). In DEG counts, 24 HAI was the most notable time point (297 and 189  
113 up- and down-regulated genes, respectively; Figure 1B). On the other hand, 12 HAI had the  
114 lowest number of DEGs (58 and 27 up- and down-regulated genes), indicating that GA  
115 transcriptional programs are mostly activated between 12 and 24 HAI and decrease afterwards,  
116 when most seeds had completed germination (Supplementary figure S1). Notably, we found 63  
117 genes that are significantly up-regulated at 24 HAI and down-regulated at 36 HAI by PBZ  
118 (Supplementary table S5, Supplementary figure S3). About 41% (26 out of 63) of these genes  
119 are related with photosynthesis and their up-regulation by PBZ at 24 HAI followed by a down-  
120 regulation at 36 HAI might be a strategy to anticipate the transition to autotrophic growth in  
121 the absence of energetic resources resulting from proper GA signaling. This gene set encodes  
122 chloroplast ATP synthase subunits, RuBisCO, chloroplast ribosomal proteins, DNA-directed RNA  
123 polymerase subunit beta (*rpoC1*), YCF3 and several photosystem I and II subunits. Decrease in  
124 the expression of plastidial RNA polymerases (i.e. *rpoB* and *rpoC1*) caused aberrant chloroplast  
125 development and diminish photoautotrophic growth in *A. thaliana* [26]. Chloroplast *YCF3*  
126 encodes a thylakoid protein that is essential for photosystem I complex biogenesis in tobacco  
127 [27] and *Chlamydomonas reinhardtii* [28]. The regulation of photosynthesis genes by GA has  
128 also been recently demonstrated in rice seedlings under submergence [29]. Interestingly all  
129 these 26 genes are nuclear encoded copies of genes that are located in the soybean chloroplast  
130 (Reference Sequence: NC\_007942). Most of these copies seem to be functional, as they encode  
131 proteins with high sequence coverage (68 to 100%) and similarity (78 to 100%) with their  
132 plastidial counterparts (Supplementary table S6). Similarly, 17 out of 63 genes encode proteins  
133 similar to those encoded by mitochondrial genes (Reference sequence: JX463295)  
134 (Supplementary table S6). Collectively, these genes might integrate a system to reduce the

135 dependence on cotyledonary reserves and optimize ATP production. Out of these 43 genes with  
136 organellar copies, 41 have been assigned to soybean reference chromosomes, suggesting that  
137 they are not annotated as nuclear genes due to contamination of organelle DNA fragments.

138

### 139 **Gene Ontology and KEGG pathway enrichment analysis**

140 Aiming to unravel major trends in the DEG lists, we conducted Gene Ontology (GO) and  
141 KEGG pathway enrichment analyses. There was no enrichment of GO terms or KEGG pathways  
142 at 12 HAI. In up-regulated genes at 24 HAI, we found a total of 19 enriched GO terms, including  
143 terms related with photosynthesis and translation (Supplementary table S7). Three of the GO  
144 terms enriched in the genes up-regulated at 24 HAI were also found enriched in the genes  
145 down-regulated at 36 HAI, namely “generation of precursor metabolites and energy”,  
146 “photosynthesis” and “thylakoid” (Supplementary table S7), providing further support to the  
147 results discussed in the previous section.

148 KEGG pathway enrichment analysis revealed that ‘plant hormone signal transduction’  
149 was enriched in down-regulated genes at 24 HAI and 36 HAI, supporting the regulation of other  
150 hormonal pathways by GA, and possibly their cross-talk, during germination (Supplementary  
151 table S8). These genes are involved in BR, auxin, jasmonic acid, ABA and cytokinin signaling or  
152 biosynthesis. Given their indispensable roles in regulating seed germination, genes related with  
153 hormone signaling and biosynthesis are discussed in more detail in the next section. In down-  
154 regulated genes at 36 HAI, a number of genes encoding chaperones resulted in the enrichment  
155 of the pathway ‘protein processing in endoplasmic reticulum’. Phenylpropanoid biosynthesis  
156 genes were enriched in PBZ-down (7 genes) and PBZ-up genes (6 genes) at 24 HAI and 36 HAI,  
157 respectively. These genes include  $\beta$ -glucosidases, peroxidases and spermidine  
158 hydroxycinnamoyl transferases that might be involved in cell wall modification or oxidative  
159 stress response (Supplementary table S8). ‘Biosynthesis of secondary metabolites’ genes were  
160 enriched in PBZ-down (15 genes) at 24 HAI and, both in PBZ-up (23 genes) and PBZ-down genes  
161 (15 genes) at 36 HAI. Most of these PBZ-up genes encode UDP-glycosyltransferases,  
162 cytochrome P450 proteins and brassinosteroid-6-oxidases, whereas PBZ-down genes encode 3-

163 ketoacyl-CoA synthases, 1-amino-cyclopropane-1-carboxylate synthases (ACS) and peroxidases  
164 (Supplementary tables S8). 'Glutathione metabolism', 'RNA polymerase', 'purine metabolism',  
165 'nucleotide excision repair', 'pyrimidine metabolism' and spliceosome pathways were only  
166 enriched in up-regulated genes at 24 HAI (Supplementary tables S8). All 'glutathione  
167 metabolism' DEGs encode glutathione-S-transferases (GSTs) and their up-regulation is related  
168 to an increased antioxidant capacity [30]. Increased antioxidant capacity and DNA repair  
169 mechanisms at 24 HAI in response to PBZ might be part of a tolerance mechanism to cope with  
170 the germination delay, which is in line with a recent study that proposed a link between DNA  
171 repair and antioxidant activity in *Medicago truncatula* seed germination and seedling  
172 establishment [31].

173

#### 174 **Feedback regulation and cross-talk with other hormones**

175 GA biosynthesis can be divided into early (*CPS*, *KS*, *KO* and *KAO*) and late (e.g. *GA20ox*  
176 and *GA3ox*) stages [1]. While early GA biosynthesis genes are generally not affected by GA [32],  
177 a negative GA-mediated feedback mechanism involving the down-regulation of late GA  
178 biosynthesis genes and up-regulation of the GA-deactivating *GA2ox* has been proposed as a  
179 system to keep balanced GA levels [1]. Although not included by our statistical thresholds, we  
180 found *GA3ox* and *GA20ox* genes with greater expression in the presence of PBZ at 24 HAI and  
181 36 HAI (Figure 2, Supplementary table S9), which might indicate a compensating mechanism in  
182 response to PBZ. Long- and short-distance GA movement are also critical for developmental  
183 processes such as seed germination [33]. Recently, some transporters from the NPF and SWEET  
184 families transport GA *in planta* [34, 35]. Curiously, NPF3 transports GA and ABA in *A. thaliana*  
185 [35]. We found two *NPF3* genes strongly up-regulated by PBZ at 36 HAI, which is in accordance  
186 with the GA-mediated repression of *NPF3* expression [35]. The spatiotemporal expression  
187 pattern of *NPF3* has been proposed as a key aspect of its functionality [35]. In line with this,  
188 recent elegant works in *A. thaliana* showed that GA gradients correlate with cell length in dark-  
189 grown hypocotyls [36, 37]. We hypothesize that this might be the case in soybean embryonic

190 axes, particularly in the context of the recently described radicle-derived growth pattern in  
191 germinating soybean embryos [38].

192 In addition to biosynthesis and transport, we have also investigated GA signaling genes.  
193 We found 11 DELLA genes (one PBZ-down at 24 HAI) and all 5 GID1s [17] expressed in at least  
194 one time point (Figure 2, Supplementary table S9). Almost all DELLAs showed greater  
195 expression in the absence of PBZ (Figure 2, Supplementary table S9). The expression levels of  
196 GID1b1, GID1b2 and GID1b3 were greater in PBZ than in controls (except GID1b1 and GID1b3 at  
197 24 HAI), supporting that GID1b is particularly important under low GA concentrations, as  
198 previously hypothesized by us and others [2, 17]. Collectively, our results support that the low  
199 GA production resulting from PBZ administration activates an intricate system involving GA  
200 biosynthesis, signaling and transport genes, probably to minimize the effects of impaired GA  
201 production to allow germination to occur.

202

### 203 **Other phytohormones**

204 ABA is the most notorious GA antagonist for its inhibitory effect on seed germination [1,  
205 19]. The regulatory step in ABA biosynthesis is catalyzed by 9-cis-epoxycarotenoid dioxygenase  
206 (NCED), which is transcriptionally regulated by positive and negative feedback loops in different  
207 species [39, 40]. The ABA receptor (PYL) inhibits the protein phosphatase 2C (PP2C) in the  
208 presence of ABA [41]. We found one *NCED3* (*Glyma.08G176300*) and two *PP2Cs* as PBZ-down  
209 and one *PYL5* as PBZ-up (Figures 2 and 3, Supplementary table S9). In addition, two ABA  
210 transporters, *ABCG40* (up-regulated, *Glyma.19G169400*) and *NRT1.2* (down-regulated,  
211 *Glyma.08G296000*) were also differentially expressed upon PBZ treatment (Supplementary  
212 table S9). Collectively, these results show that GA modulate different genes involved in ABA  
213 biosynthesis, signaling and transport, which might directly interfere with a gradient of GA:ABA  
214 ratios along germinating soybean embryonic axes. This GA:ABA dynamics might be involved in  
215 the differential cell expansion patterns observed in germinating soybean embryos [38].



216 GA and ethylene positively interact with each other, promoting seed germination in  
217 several species [42]. Multiple lines of evidence, including PBZ administration, support the  
218 positive regulation of ethylene biosynthesis and signaling by GA [14, 43-46]. Further, several  
219 ethylene biosynthesis genes are expressed in soybean embryonic axes during germination [25].  
220 Accordingly, we found three PBZ-down 1-amino-cyclopropane-1-carboxylate synthase (ACS)  
221 genes (Figure 2, Supplementary table S9). ACS catalyzes the first committed and rate-limiting  
222 step in ethylene biosynthesis [47]. Our results suggest that up-regulation of ACS by GA is likely a  
223 key part of the synergy between GA and ethylene during soybean germination.

224 Several studies have shown that auxin inhibits or delays seed germination in wheat [48],  
225 *Arabidopsis* [49] and soybean [50]. On the other hand, exogenous GA<sub>4</sub> up-regulated auxin  
226 biosynthesis and carrier genes in germinating *Arabidopsis* seeds [14], supporting a complex GA-  
227 auxin cross-talk during soybean germination. There are multiple tryptophan-dependent IAA  
228 biosynthesis pathways in plants [51]. The tryptophan aminotransferases *TAR1* and *TAR2*  
229 convert trp to indole-3-pyruvate (IPA), which is converted to indole acetic acid (IAA) by the  
230 YUCCA flavin monooxygenase [52]. Further, *superroot2* (*SUR2*) encodes the cytochrome P450  
231 monooxygenase CYP83B1, involved in glucosinolate biosynthesis and auxin homeostasis [53,  
232 54]. We found two PBZ-up *SUR2* at 12 HAI and one PBZ-down *TAR2* at 24 HAI, indicating that  
233 GA promotes IAA production at these time points. We also found one auxin transporter (*PIN*;  
234 PBZ-up) and eleven auxin-responsive genes, including seven PBZ-down Auxin/Indole-3-Acetic  
235 Acid (Aux/IAA) repressors, small auxin upregulated RNA (SAUR), and the auxin-responsive  
236 Gretchen Hagen3 (GH3) family were differentially expressed at least at one of the time-point  
237 (Figures 2 and 3, Supplementary table S9). Although apparently conflicting with the promotion  
238 of IAA biosynthesis at 12 and 24 HAI, the down-regulation of several *AUX/IAA* genes by PBZ at  
239 24 HAI and 36 HAI suggests that GA represses auxin signaling during late germination.  
240 Accordingly, three *AUX/IAA* genes have been recently demonstrated to promote hypocotyl  
241 elongation in *A. thaliana* [55].

242 BRs typically induce seed germination and BR biosynthesis genes (*DET2*, *DWF4*, *DWF3*,  
243 *BR6ox1*, and *ROT3*) are up-regulated when endogenous BR concentrations are reduced [56].

244 Interestingly, six and eight BR biosynthesis genes were PBZ-up at 24 and 36 HAI, respectively  
245 (Figure 2, Supplementary table S9). BR promotes GA biosynthesis by regulating *GA20ox1* and  
246 *GA3ox1* expression in *A. thaliana* [57]. Further, GA partially rescued hypocotyl elongation  
247 defects resulting from BR deficiency [57]. Our group has proposed that BR signaling regulates  
248 cell expansion during soybean germination [25]. Taken together, the up-regulation of BR  
249 biosynthesis upon PBZ treatment might be involved in the activation of late GA biosynthesis  
250 genes to counter PBZ effects on GA production. This hypothesis also fits the observation that  
251 PBZ delays germination without a clear effect on germination rates (Supplementary Figure S1E).  
252 Finally, since BR also promotes GA biosynthesis in rice [58], the emergence of this regulatory  
253 module probably predates the diversification of monocotyledonous and dicotyledonous  
254 species.

255 Antagonistic interactions between GA and cytokinin (CK) have been reported in  
256 different plants [59-61]. Type-A response regulators negatively regulate CK signaling by  
257 competing with type-B response regulators for phosphoryl transfer from the upstream  
258 *Arabidopsis* Hpt proteins or by interacting with other pathway components [62]. We found four  
259 and three PBZ-down type-A response regulators at 24 HAI and 36 HAI, respectively (Figure 3,  
260 Supplementary table S9). Since CK biosynthesis genes were not differentially expressed, our  
261 results indicate GA antagonizes CK by the up-regulation of negative CK signaling regulators  
262 during soybean germination.

263 In the canonical Jasmonic Acid (JA) signaling pathway, the receptor CORONATINE  
264 INSENSITIVE 1 (COI1) interacts with JA and promotes the proteasomal degradation of  
265 JASMONATE ZIM-domain (JAZ) repressors [63]. JAZ represses the transcription of JA-responsive  
266 genes through interaction with the MYC2 TF and other regulatory proteins [63, 64]. JA and GA  
267 perform antagonistic roles in regulating hypocotyl elongation via physical interactions between  
268 JAZ and DELLA repressors. In summary, JA-mediated JAZ degradation releases DELLA to repress  
269 GA signaling (and hypocotyl elongation), whereas GA-mediated DELLA degradation releases JAZ  
270 to inhibit JA responses [64, 65]. We found two PBZ-down *JAZ* genes at 24 HAI (Supplementary  
271 table S9), indicating that GA represses JA signaling during germination. Interestingly, *JAZ* up-

272 regulation might constitute an additional layer of JA repression, as GA-promoted DELLA  
273 degradation would release JAZ proteins to repress JA signaling, as discussed above.

274

## 275 **Gibberellins regulate cell wall remodeling enzymes**

276 Several genes encoding cell elongation and cell wall remodeling enzymes such as  
277 xyloglucan endotransglycosylase/hydrolases (XTH), pectin methylesterases (PME), expansins,  
278 pectin lyases, aquaporin and others are induced by GA in *Arabidopsis* and tomato seed  
279 germination [14, 22, 66-68]. We found a number of these cell wall remodeling genes as  
280 differentially expressed (Figure 5A). Peroxidases and glycosyl hydrolases (GHs) also play active  
281 role in cell wall loosening [69, 70]. Accordingly, nine and eight peroxidases and GHs were  
282 differentially expressed, respectively. Genes involved in pectin metabolism were also  
283 modulated by PBZ (Figure 5A), suggesting that this process is also under GA regulation during  
284 germination. We also found other cell wall related DEGs, such as arabinogalactan-proteins,  
285 fasciclin-like AGPs, hydroxyproline (Hyp)-rich glycoproteins, and proline- or glycine-rich  
286 proteins, which play important roles in cell proliferation [71-73] and expansion [74]. Several of  
287 those genes are also GA-responsive in cucumber, maize and barley [75-77]. Importantly, 30 out  
288 of 44 cell wall DEGs were PBZ-down, supporting that the notorious effect of GA in promoting  
289 cell elongation.

290

## 291 **Transcription factor genes modulated by paclobutrazol are likely drivers of GA-mediated 292 transcriptional reprogramming**

293 Because seed germination is mainly regulated by the embryonic axis, we have  
294 specifically investigated the differential expression of TFs in this tissue, as they might be major  
295 drivers of the GA transcriptional programs. A total of 45 TFs were differentially expressed upon  
296 PBZ treatment. Strikingly, one, 18 and 23 TFs were differentially expressed exclusively at 12, 24  
297 and 36 HAI, respectively (Figure 5B, Supplementary Table S3). This pattern indicates that  
298 differentially expressed TFs play specific roles at different germination times. Further, most of

299 the differentially expressed TFs (66.7%) were down-regulated by PBZ and likely comprise  
300 regulators that are downstream of GA (Figure 5B, Supplementary Table S3). The TF families with  
301 the greatest number of down-regulated members were MyB (myelobastosis; 10 down), bHLH  
302 (basic helix-loop-helix; 8 down) and bZIP (basic leucine zipper domain; 3 down), which is in line  
303 with previous studies in soybean [25] and *A. thaliana* [22], which showed that MyB and bHLH  
304 are among the mostly activated TF families during germination. Interestingly, five and six of the  
305 PBZ-down MYB and bHLH genes, respectively, were also differentially expressed in a time-  
306 dependent manner during soybean germination [25], further supporting that GA coordinate the  
307 transcription of specific TFs at different HAI. Conversely, S1Fa-like (4 up) and WRKY (3 up) were  
308 the families that were most represented among PBZ-up TFs (Figure 5B, Supplementary Table  
309 S3). S1Fa-like is a poorly-studied TF family that has been associated with photomorphogenesis  
310 [78]. Remarkably, all four soybean S1Fa-like TFs were strongly up-regulated by PBZ at 24 HAI,  
311 indicating that they might be part of the regulatory system to activate photosynthetic growth in  
312 response to low GA concentrations, as discussed above. Photomorphogenesis is regulated by a  
313 complex pathway involving GA and light in *A. thaliana* seedlings [79, 80]. Nevertheless, no PIF  
314 or HY5 genes, which encode important regulators of photomorphogenesis, were modulated by  
315 PBZ.

316

### 317 **Comparison with *A. thaliana* GA-responsive genes**

318 Ogawa *et al* identified a total of 230 and 127 up- and down-regulated genes during  
319 germination of *A. thaliana ga1-3* seeds upon GA treatment [14]. Other study, also in *A.*  
320 *thaliana*, reported DEGs in imbibed seeds and developing flowers of wild type, *ga1-3*, and a  
321 quintuple DELLA null mutant (*ga1 rga gai rgl1 rgl2*) [22]. This latter study identified 541 and 571  
322 up- and down-regulated GA-responsive genes in imbibed seeds. It is important to mention that  
323 Ogawa *et al.* used a microarray platform representing ~8,200 genes, while Cao *et al.* used one  
324 covering ~23,000 genes. This difference is likely an important factor accounting for the  
325 differences in DEG numbers between these studies. Overall, these studies have an overlap of  
326 109 GA-up genes and 90 GA-down genes. Importantly, a significant fraction of these genes are  
327 also regulated by DELLA [22].

328           Although *A. thaliana* and soybean are distantly related and their seeds are remarkably  
329 different, we investigated the conservation of the DEGs identified in *A. thaliana* described  
330 above with the ones reported here using BLASTP (minimum query coverage and similarity of  
331 50%). We found 178 and 124 differentially expressed soybean orthologs for 122 and 84 *A.*  
332 *thaliana* GA-up and GA-down genes, respectively. These soybean gene sets were named GA-up-  
333 orthologs and GA-down-orthologs, respectively. Curiously, a significant part (47.19% and  
334 55.66% of the GA-up-orthologs and GA-down-orthologs, respectively) of these genes are  
335 modulated in opposite directions in the two species (Supplementary Table S10). Nevertheless,  
336 most of the genes related with cell-wall modification, GSTs, auxin responsive genes (AUX/IAA  
337 and SAUR), oxidoreductases (aldo-ketoreductases), and transferases are modulated in same  
338 directions in soybean and *A. thaliana*, whereas genes modulated in opposite directions  
339 between the species encode HSPs, cytochrome p450, serine carboxypeptidases, late  
340 embryogenesis proteins and flavonol synthase/flavanone 3-hydroxylase (Supplementary Table  
341 S10). Proportionally and in absolute numbers, 24 HAI is the stage with the most conserved DEG  
342 profile between the two species. Further, 351 out of the 468 soybean DEGs without a DEG  
343 ortholog in *A. thaliana* do have orthologs in the *A. thaliana* genome, indicating that a several  
344 orthologous genes are differentially regulated in the two species. Finally, in addition to the  
345 evolutionary distance, there are also important technical aspects that require consideration.  
346 The *A. thaliana* studies used microarrays to investigate modulated genes in *ga1-3* mutants  
347 either upon treatment with exogenous GA [14] or in contrast with wild type seeds during  
348 germination [22]. Here we analyzed an RNA-Seq transcriptome of embryonic axes of  
349 germinating soybean seeds treated with PBZ. Both experimental designs have limitations; even  
350 the *A. thaliana ga1-3* dry seeds have bioactive GA from the GA treatment used to rescue  
351 parental fertility of mutant plants [14]. In addition, administration of exogenous GA may have  
352 unintended effects due to locations and concentrations different from those found under  
353 natural conditions. On the other hand, while allowing the investigation with more natural GA  
354 concentrations and locations, chemical inhibition of GA biosynthesis probably does not  
355 shutdown GA signaling completely. Further, it is not unreasonable to expect that the inhibitor  
356 effects might be overcome after some time, for example by an increase in the levels of GA

357 biosynthesis enzymes. A more detailed picture of the interspecies conservation of GA-driven  
358 transcriptional programs will be clearer when more species are studied using state-of-the-art  
359 RNA-Seq technologies.

360

## 361 **MATERIAL AND METHODS**

362

### 363 **Plant material and growth conditions**

364 *G. max* seeds (BRS-284, from EMBRAPA, Brazil) were used in this study. Seeds were  
365 surface sterilized with 70% ethanol for 1 minute and with commercial bleach (1% v/v) for 3  
366 minutes, followed by three washes with sterile distilled water (30 seconds per wash). Seeds  
367 were germinated in 15 cm Petri dishes with 2 g of sterile cotton in two conditions: in the  
368 presence of 30 ml of sterile water (control) or sterile water with 200  $\mu$ M paclobutrazol (Sigma  
369 Aldrich). Seeds were allowed to germinate in an incubation chamber at 28°C and 12/12h  
370 photoperiod (dark/light). We used three plates per sample, with 20 seeds per plate. Embryonic  
371 axes from dry seeds were also collected. For total RNA extraction, seeds were harvested at 12,  
372 24 and 36 HAI in control and PBZ treated conditions. Embryonic axes were separated from  
373 cotyledons and immediately placed in *RNAlater*<sup>TM</sup> (Qiagen) until RNA extraction. RNA was  
374 extracted from harvested embryonic axes using RNeasy Plant Mini Kit (Qiagen) according to  
375 manufacturer instructions. Three independent biological replicates of each condition were  
376 used.

377

### 378 **RNA purification, sequencing and analysis**

379 RNA-Seq libraries were prepared using the TruSeq RNA Sample Preparation Kit v2 and  
380 submitted to 1x100bp single-end sequencing on a HiSeq 2500 instrument at LaCTAD (UNICAMP,  
381 Campinas, Brazil). Read quality was assessed by FastQC  
382 (<http://www.bioinformatics.babraham.ac.uk/projects/fastqc/>). Reads were aligned on *G. max*  
383 cv. Williams 82 reference genome version 2 (Wm82.a2.v1) using novoalign (V3.06.05;

384 <http://www.novocraft.com>). Gene expression levels were calculated with cufflinks v2.1.1 [81]  
385 and normalized by reads per kilobase of transcript per million mapped reads (RPKM). Genes  
386 with RPKM greater than or equal to one were considered expressed. The differential expression  
387 between Control vs PBZ at 12 HAI, 24 HAI and 36 HAI were determined by cuffdiff v2.2.1 [81].  
388 Genes with at least two-fold difference in expression and q-value  $\leq 0.05$  were considered  
389 differentially expressed. Enrichment of Gene Ontology (GO) term was performed using agriGO  
390 (v2.0) with hypergeometric test, corrected by the Hochberg FDR method (FDR  $\leq 0.05$ ) [82].  
391 Redundant GO terms were removed with REViGO [83]. KOBAS 3.0 [84] was used to assess the  
392 enrichment of DEGs in KEGG pathways (Fisher's exact test,  $P < 0.05$ ). The list of expressed genes  
393 (i.e. RPKM  $\geq 1$ ) were used as the background set for GO and KEGG enrichment analyses. *G. max*  
394 TFs were obtained from the Plant Transcription Factor Database (PlantTFDB) [85]. The datasets  
395 generated in this study have been deposited in the NCBI Gene Expression Omnibus database,  
396 under the accession number GSE112872.

397

## 398 **ACKNOWLEDGEMENTS**

399 This work was supported by Fundação Carlos Chagas Filho de Amparo à Pesquisa do Estado do  
400 Rio de Janeiro (FAPERJ; grants E-26/010.002019/2014 and E-26/102.259/2013), Coordenação  
401 de Aperfeiçoamento de Pessoal de Nível Superior - Brasil (CAPES; Finance Code 001) and  
402 Conselho Nacional de Desenvolvimento Científico e Tecnológico (CNPq). We thank the Life  
403 Sciences Core Facility (LaCTAD) of State University of Campinas (UNICAMP) for library  
404 preparation and RNA sequencing. The funding agencies had no role in the design of the study  
405 and collection, analysis, and interpretation of data and in writing.

406

407

## 408 **REFERENCES**

- 409 [1] N. Olszewski, T.-P. Sun, F. Gubler, Gibberellin signaling: biosynthesis, catabolism, and response  
410 pathways., *The Plant cell*, 14 Suppl (2002) S61-S80.  
411 [2] E. Tanimoto, K. Hirano, Role of Gibberellins in Root Growth, in: A. Eshel, T. Beeckman (Eds.) *Plant*  
412 *Roots: The Hidden Half*, CRC Press, 2013, pp. 13-11--13-14.  
413 [3] J.D. Bewley, Seed Germination and Dormancy, *THE PLANT CELL ONLINE*, 9 (1997) 1055-1066.

- 414 [4] J.D. Bewley, K.J. Bradford, H.W.M. Hilhorst, H. Nonogaki, *Seeds: Physiology of Development,*  
415 *Germination and Dormancy*, Springer New York, New York, NY, 2013.
- 416 [5] L. Rajjou, M. Duval, K. Gallardo, J. Catusse, J. Bally, C. Job, D. Job, *Seed Germination and Vigor*, *Annual*  
417 *Review of Plant Biology*, 63 (2012) 507-533.
- 418 [6] K. Weitbrecht, K. Müller, G. Leubner-Metzger, *First off the mark: Early seed germination*, *Journal of*  
419 *Experimental Botany*, 62 (2011) 3289-3309.
- 420 [7] T. Urbanova, G. Leubner-Metzger, *Gibberellins and seed germination*, in: *Annual Plant Reviews*,  
421 *Volume 49*, 2016, pp. 253-284.
- 422 [8] S.P.C. Groot, J. Bruinsma, C.M. Karssen, *The role of endogenous gibberellin in seed and fruit*  
423 *development of tomato: Studies with a gibberellin-deficient mutant*, *Physiologia Plantarum*, 71  
424 (1987) 184-190.
- 425 [9] M. Koornneef, J.H. van der Veen, *Induction and analysis of gibberellin sensitive mutants in*  
426 *Arabidopsis thaliana (L.) heynh.*, *Theoretical and Applied Genetics*, 58 (1980) 257-263.
- 427 [10] S.E. Jacobsen, N.E. Olszewski, *Mutations at the SPINDLY locus of Arabidopsis alter gibberellin signal*  
428 *transduction.*, *The Plant cell*, 5 (1993) 887-896.
- 429 [11] C.M. Karssen, S. Zaorski, J. Kepczynski, S.P.C. Groot, *Key Role for Endogenous Gibberellins in the*  
430 *Control of Seed Germination*, *Ann. Bot.*, 63 (1989) 71-80.
- 431 [12] E. Nambara, T. Akazawa, P. McCourt, *Effects of the gibberellin biosynthetic inhibitor uniconazol on*  
432 *mutants of Arabidopsis.*, *Plant physiology*, 97 (1991) 736-738.
- 433 [13] P. Hedden, J.E. Graebe, *Inhibition of gibberellin biosynthesis by paclobutrazol in cell-free*  
434 *homogenates of Cucurbita maxima endosperm and Malus pumila embryos*, *Journal of Plant Growth*  
435 *Regulation*, 10 (1985) 111-122.
- 436 [14] M. Ogawa, A. Hanada, Y. Yamauchi, A. Kuwahara, Y. Kamiya, S. Yamaguchi, *Gibberellin biosynthesis*  
437 *and response during Arabidopsis seed germination.*, *The Plant cell*, 15 (2003) 1591-1604.
- 438 [15] M. Ueguchi-Tanaka, M. Ashikari, M. Nakajima, H. Itoh, E. Katoh, M. Kobayashi, T.-y. Chow, Y.-i.C.  
439 Hsing, H. Kitano, I. Yamaguchi, M. Matsuoka, *GIBBERELLIN INSENSITIVE DWARF1 encodes a soluble*  
440 *receptor for gibberellin.*, *Nature*, 437 (2005) 693-698.
- 441 [16] A. Voegelé, A. Linkies, K. Muller, G. Leubner-Metzger, *Members of the gibberellin receptor gene*  
442 *family GID1 (GIBBERELLIN INSENSITIVE DWARF1) play distinct roles during Lepidium sativum and*  
443 *Arabidopsis thaliana seed germination*, *Journal of Experimental Botany*, 62 (2011) 5131-5147.
- 444 [17] R.K. Gazara, K.C. Moharana, D. Bellieny-Rabelo, T.M. Venancio, *Expansion and diversification of the*  
445 *gibberellin receptor GIBBERELLIN INSENSITIVE DWARF1 (GID1) family in land plants*, *Plant*  
446 *Molecular Biology*, 97 (2018) 435-449.
- 447 [18] K. Murase, Y. Hirano, T.-p. Sun, T. Hakoshima, *Gibberellin-induced DELLA recognition by the*  
448 *gibberellin receptor GID1.*, *Nature*, 456 (2008) 459-463.
- 449 [19] B. Kucera, M.A. Cohn, G. Leubner-Metzger, *Plant hormone interactions during seed dormancy*  
450 *release and germination*, *Seed Science Research*, 15 (2005) 281-307.
- 451 [20] M.J. Holdsworth, L. Bentsink, W.J.J. Soppe, *Molecular networks regulating Arabidopsis seed*  
452 *maturation, after-ripening, dormancy and germination*, *New Phytologist*, 179 (2008) 33-54.
- 453 [21] A. Linkies, K. Muller, K. Morris, V. Tureckova, M. Wenk, C.S.C. Cadman, F. Corbineau, M. Strnad, J.R.  
454 Lynn, W.E. Finch-Savage, G. Leubner-Metzger, *Ethylene Interacts with Abscisic Acid to Regulate*  
455 *Endosperm Rupture during Germination: A Comparative Approach Using Lepidium sativum and*  
456 *Arabidopsis thaliana*, *The Plant Cell*, 21 (2009) 3803-3822.
- 457 [22] D. Cao, H. Cheng, W. Wu, H.M. Soo, J. Peng, *Gibberellin mobilizes distinct DELLA-dependent*  
458 *transcriptomes to regulate seed germination and floral development in Arabidopsis.*, *PLANT*  
459 *PHYSIOLOGY*, 142 (2006) 509-525.
- 460 [23] J.L. Nemhauser, F. Hong, J. Chory, *Different Plant Hormones Regulate Similar Processes through*  
461 *Largely Nonoverlapping Transcriptional Responses*, *Cell*, 126 (2006) 467-475.



- 462 [24] R. Zentella, Z.-L. Zhang, M. Park, S.G. Thomas, A. Endo, K. Murase, C.M. Fleet, Y. Jikumaru, E.  
463 Nambara, Y. Kamiya, T.-p. Sun, Global Analysis of DELLA Direct Targets in Early Gibberellin Signaling  
464 in Arabidopsis, *The Plant Cell*, 19 (2007) 3037-3057.
- 465 [25] D. Bellieny-Rabelo, E. Alves Gamosa de Oliveira, E. da Silva Ribeiro, E. Pessoa Costa, A. Elenir  
466 Amâncio Oliveira, T. Motta Venancio, Transcriptome analysis uncovers key regulatory and  
467 metabolic aspects of soybean embryonic axes during germination, *Scientific Reports*, 6 (2016)  
468 36009.
- 469 [26] A. Hricova, The SCABRA3 Nuclear Gene Encodes the Plastid RpoTp RNA Polymerase, Which Is  
470 Required for Chloroplast Biogenesis and Mesophyll Cell Proliferation in Arabidopsis, *PLANT*  
471 *PHYSIOLOGY*, 141 (2006) 942-956.
- 472 [27] S. Ruf, H. Kössel, R. Bock, Targeted inactivation of a tobacco intron-containing open reading frame  
473 reveals a novel chloroplast-encoded photosystem I-related gene., *The Journal of cell biology*, 139  
474 (1997) 95-102.
- 475 [28] E. Boudreau, The chloroplast ycf3 and ycf4 open reading frames of *Chlamydomonas reinhardtii* are  
476 required for the accumulation of the photosystem I complex, *The EMBO Journal*, 16 (1997) 6095-  
477 6104.
- 478 [29] J. Xiang, H. Wu, Y. Zhang, Y. Zhang, Y. Wang, Z. Li, H. Lin, H. Chen, J. Zhang, D. Zhu, Transcriptomic  
479 Analysis of Gibberellin- and Paclobutrazol-Treated Rice Seedlings under Submergence, *International*  
480 *Journal of Molecular Sciences*, 18 (2017) 2225.
- 481 [30] V.P. Roxas, R.K. Smith, E.R. Allen, R.D. Allen, Overexpression of glutathione S-  
482 transferase/glutathioneperoxidase enhances the growth of transgenic tobacco seedlings during  
483 stress, *Nature Biotechnology*, 15 (1997) 988-991.
- 484 [31] A. Pagano, S.S. Araujo, A. Macovei, P. Leonetti, A. Balestrazzi, The Seed Repair Response during  
485 Germination: Disclosing Correlations between DNA Repair, Antioxidant Response, and Chromatin  
486 Remodeling in *Medicago truncatula*, *Front Plant Sci*, 8 (2017) 1972.
- 487 [32] C.A. Helliwell, C.C. Sheldon, M.R. Olive, A.R. Walker, J.A. Zeevaart, W.J. Peacock, E.S. Dennis, Cloning  
488 of the Arabidopsis ent-kaurene oxidase gene GA3., *Proceedings of the National Academy of*  
489 *Sciences of the United States of America*, 95 (1998) 9019-9024.
- 490 [33] J. Binenbaum, R. Weinstain, E. Shani, Gibberellin Localization and Transport in Plants, *Trends in*  
491 *Plant Science*, 23 (2018) 410-421.
- 492 [34] Y. Kanno, T. Oikawa, Y. Chiba, Y. Ishimaru, T. Shimizu, N. Sano, T. Koshiba, Y. Kamiya, M. Ueda, M.  
493 Seo, AtSWEET13 and AtSWEET14 regulate gibberellin-mediated physiological processes, *Nature*  
494 *Communications*, 7 (2016) 13245.
- 495 [35] I. Tal, Y. Zhang, M.E. Jørgensen, O. Pisanty, I.C.R. Barbosa, M. Zourelidou, T. Regnault, C. Crocoll, C.  
496 Erik Olsen, R. Weinstain, C. Schwechheimer, B.A. Halkier, H.H. Nour-Eldin, M. Estelle, E. Shani, The  
497 Arabidopsis NPF3 protein is a GA transporter, *Nature Communications*, 7 (2016) 11486.
- 498 [36] A. Rizza, A. Walia, V. Lanquar, W.B. Frommer, A.M. Jones, In vivo gibberellin gradients visualized in  
499 rapidly elongating tissues, *Nat Plants*, 3 (2017) 803-813.
- 500 [37] A. Rizza, A.M. Jones, The makings of a gradient: spatiotemporal distribution of gibberellins in plant  
501 development, *Curr Opin Plant Biol*, 47 (2018) 9-15.
- 502 [38] N.M. Souza, A.T. Topham, G.W. Bassel, Quantitative analysis of the 3D cell shape changes driving  
503 soybean germination, *Journal of Experimental Botany*, 68 (2017) 1531-1537.
- 504 [39] F.D. Espasandin, S.J. Maiale, P. Calzadilla, O.A. Ruiz, P.A. Sansberro, Transcriptional regulation of 9-  
505 cis-epoxycarotenoid dioxygenase (NCED) gene by putrescine accumulation positively modulates  
506 ABA synthesis and drought tolerance in *Lotus tenuis* plants, *Plant Physiology and Biochemistry*, 76  
507 (2014) 29-35.

- 508 [40] S. Liu, M. Li, L. Su, K. Ge, L. Li, X. Li, X. Liu, L. Li, Negative feedback regulation of ABA biosynthesis in  
509 peanut (*Arachis hypogaea*): a transcription factor complex inhibits AhNCED1 expression during  
510 water stress, *Scientific Reports*, 6 (2016) 37943.
- 511 [41] T. Umezawa, N. Sugiyama, M. Mizoguchi, S. Hayashi, F. Myouga, K. Yamaguchi-Shinozaki, Y.  
512 Ishihama, T. Hirayama, K. Shinozaki, Type 2C protein phosphatases directly regulate abscisic acid-  
513 activated protein kinases in *Arabidopsis*, *Proceedings of the National Academy of Sciences*, 106  
514 (2009) 17588-17593.
- 515 [42] F. Corbineau, Q. Xia, C. Bailly, H. El-Maarouf-Bouteau, Ethylene, a key factor in the regulation of  
516 seed dormancy, *Front Plant Sci*, 5 (2014) 539.
- 517 [43] A.P. Calvo, C. Nicolas, O. Lorenzo, G. Nicolas, D. Rodriguez, Evidence for positive regulation by  
518 gibberellins and ethylene of ACC oxidase expression and activity during transition from dormancy to  
519 germination in *Fagus sylvatica* L. seeds, *Journal of Plant Growth Regulation*, 23 (2004) 44-53.
- 520 [44] A.P. Calvo, C. Nicolas, G. Nicolas, D. Rodriguez, Evidence of a cross-talk regulation of a GA 20-  
521 oxidase (*FsGA20ox1*) by gibberellins and ethylene during the breaking of dormancy in *Fagus*  
522 *sylvatica* seeds., *Physiologia Plantarum*, 120 (2004) 623-630.
- 523 [45] J. Hua, H. Sakai, S. Nourizadeh, Q.G. Chen, A.B. Bleecker, J.R. Ecker, E.M. Meyerowitz, EIN4 and ERS2  
524 are members of the putative ethylene receptor gene family in *Arabidopsis*., *The Plant cell*, 10 (1998)  
525 1321-1332.
- 526 [46] A. Lehman, R. Black, J.R. Ecker, HOOKLESS1, an ethylene response gene, is required for differential  
527 cell elongation in the *Arabidopsis* hypocotyl., *Cell*, 85 (1996) 183-194.
- 528 [47] S.F. Yang, N.E. Hoffman, Ethylene Biosynthesis and its Regulation in Higher Plants, *Annual Review of*  
529 *Plant Physiology and Plant Molecular Biology*, 35 (1984) 155-189.
- 530 [48] S. Ramaih, M. Guedira, G.M. Paulsen, Relationship of indoleacetic acid and tryptophan to dormancy  
531 and preharvest sprouting of wheat, *Functional Plant Biology*, 30 (2003) 939.
- 532 [49] J. Park, Y.-S. Kim, S.-G. Kim, J.-H. Jung, J.-C. Woo, C.-M. Park, Integration of Auxin and Salt Signals by  
533 the NAC Transcription Factor NTM2 during Seed Germination in *Arabidopsis*, *PLANT PHYSIOLOGY*,  
534 156 (2011) 537-549.
- 535 [50] H. Shuai, Y. Meng, X. Luo, F. Chen, W. Zhou, Y. Dai, Y. Qi, J. Du, F. Yang, J. Liu, W. Yang, K. Shu,  
536 Exogenous auxin represses soybean seed germination through decreasing the gibberellin/abscisic  
537 acid (GA/ABA) ratio, *Scientific Reports*, 7 (2017) 12620.
- 538 [51] K. Mashiguchi, K. Tanaka, T. Sakai, S. Sugawara, H. Kawaide, M. Natsume, A. Hanada, T. Yaeno, K.  
539 Shirasu, H. Yao, P. McSteen, Y. Zhao, K.-i. Hayashi, Y. Kamiya, H. Kasahara, The main auxin  
540 biosynthesis pathway in *Arabidopsis*, *Proceedings of the National Academy of Sciences*, 108 (2011)  
541 18512-18517.
- 542 [52] Y. Zhao, Auxin Biosynthesis, *The Arabidopsis Book*, 12 (2014) e0173.
- 543 [53] I. Barlier, M. Kowalczyk, A. Marchant, K. Ljung, R. Bhalerao, M. Bennett, G. Sandberg, C. Bellini, The  
544 SUR2 gene of *Arabidopsis thaliana* encodes the cytochrome P450 CYP83B1, a modulator of auxin  
545 homeostasis, *Proc Natl Acad Sci U S A*, 97 (2000) 14819-14824.
- 546 [54] S. Bak, F.E. Tax, K.A. Feldmann, D.W. Galbraith, R. Feyereisen, CYP83B1, a cytochrome P450 at the  
547 metabolic branch point in auxin and indole glucosinolate biosynthesis in *Arabidopsis*., *The Plant cell*,  
548 13 (2001) 101-111.
- 549 [55] J.W. Reed, M.F. Wu, P.H. Reeves, C. Hodgens, V. Yadav, S. Hayes, R. Pierik, Three Auxin Response  
550 Factors Promote Hypocotyl Elongation, *Plant Physiol*, 178 (2018) 864-875.
- 551 [56] K. Tanaka, T. Asami, S. Yoshida, Y. Nakamura, T. Matsuo, S. Okamoto, Brassinosteroid homeostasis  
552 in *Arabidopsis* is ensured by feedback expressions of multiple genes involved in its metabolism.,  
553 *Plant physiology*, 138 (2005) 1117-1125.

- 554 [57] S.J. Unterholzner, W. Rozhon, M. Papacek, J. Ciomas, T. Lange, K.G. Kugler, K.F. Mayer, T. Sieberer,  
555 B. Poppenberger, Brassinosteroids Are Master Regulators of Gibberellin Biosynthesis in Arabidopsis,  
556 *Plant Cell*, 27 (2015) 2261-2272.
- 557 [58] H. Tong, Y. Xiao, D. Liu, S. Gao, L. Liu, Y. Yin, Y. Jin, Q. Qian, C. Chu, Brassinosteroid regulates cell  
558 elongation by modulating gibberellin metabolism in rice, *Plant Cell*, 26 (2014) 4376-4393.
- 559 [59] S. Fleishon, E. Shani, N. Ori, D. Weiss, Negative reciprocal interactions between gibberellin and  
560 cytokinin in tomato, *New Phytologist*, 190 (2011) 609-617.
- 561 [60] C. Fonouni-Farde, A. Kisiala, M. Brault, R.J.N. Emery, A. Diet, F. Frugier, DELLA1-Mediated  
562 Gibberellin Signaling Regulates Cytokinin-Dependent Symbiotic Nodulation, *Plant Physiology*, 175  
563 (2017) 1795-1806.
- 564 [61] Y. Greenboim-Wainberg, Cross Talk between Gibberellin and Cytokinin: The Arabidopsis GA  
565 Response Inhibitor SPINDLY Plays a Positive Role in Cytokinin Signaling, *THE PLANT CELL ONLINE*, 17  
566 (2005) 92-102.
- 567 [62] J.P.C. To, J. Deruere, B.B. Maxwell, V.F. Morris, C.E. Hutchison, F.J. Ferreira, G.E. Schaller, J.J. Kieber,  
568 Cytokinin Regulates Type-A Arabidopsis Response Regulator Activity and Protein Stability via Two-  
569 Component Phosphorelay, *THE PLANT CELL ONLINE*, 19 (2007) 3901-3014.
- 570 [63] C. Wasternack, B. Hause, Jasmonates: biosynthesis, perception, signal transduction and action in  
571 plant stress response, growth and development. An update to the 2007 review in *Annals of Botany*,  
572 *Annals of Botany*, 111 (2013) 1021-1058.
- 573 [64] S. Song, T. Qi, C. Wasternack, D. Xie, Jasmonate signaling and crosstalk with gibberellin and  
574 ethylene, *Curr Opin Plant Biol*, 21 (2014) 112-119.
- 575 [65] D.L. Yang, J. Yao, C.S. Mei, X.H. Tong, L.J. Zeng, Q. Li, L.T. Xiao, T.P. Sun, J. Li, X.W. Deng, C.M. Lee,  
576 M.F. Thomashow, Y. Yang, Z. He, S.Y. He, Plant hormone jasmonate prioritizes defense over growth  
577 by interfering with gibberellin signaling cascade, *Proc Natl Acad Sci U S A*, 109 (2012) E1192-1200.
- 578 [66] F. Chen, K.J. Bradford, Expression of an Expansin Is Associated with Endosperm Weakening during  
579 Tomato Seed Germination, *PLANT PHYSIOLOGY*, 124 (2000) 1265-1274.
- 580 [67] F. Chen, A gibberellin-regulated xyloglucan endotransglycosylase gene is expressed in the  
581 endosperm cap during tomato seed germination, *Journal of Experimental Botany*, 53 (2002) 215-  
582 223.
- 583 [68] J. Park, D.-H. Oh, M. Dassanayake, K.T. Nguyen, J. Ogas, G. Choi, T.-p. Sun, Gibberellin Signaling  
584 Requires Chromatin Remodeler PICKLE to Promote Vegetative Growth and Phase Transitions, *Plant*  
585 *Physiology*, 173 (2017) 1463-1474.
- 586 [69] Z. Minic, L. Jouanin, Plant glycoside hydrolases involved in cell wall polysaccharide degradation,  
587 *Plant Physiology and Biochemistry*, 44 (2006) 435-449.
- 588 [70] A. Liskay, B. Kenk, P. Schopfer, Evidence for the involvement of cell wall peroxidase in the  
589 generation of hydroxyl radicals mediating extension growth, *Planta*, 217 (2003) 658-667.
- 590 [71] K.J. Langan, E.A. Nothnagel, Cell surface arabinogalactan-proteins and their relation to cell  
591 proliferation and viability, *Protoplasma*, 196 (1997) 87-98.
- 592 [72] M.D. Serpe, E.A. Nothnagel, Effects of Yariv phenylglycosides on Rosa cell suspensions: Evidence for  
593 the involvement of arabinogalactan-proteins in cell proliferation, *Planta*, 193 (1994) 542-550.
- 594 [73] C. Ringli, B. Keller, U. Ryser, Glycine-rich proteins as structural components of plant cell walls.,  
595 *Cellular and molecular life sciences : CMLS*, 58 (2001) 1430-1441.
- 596 [74] W.G. Willats, J.P. Knox, A role for arabinogalactan-proteins in plant cell expansion: evidence from  
597 studies on the interaction of beta-glucosyl Yariv reagent with seedlings of Arabidopsis thaliana., *The*  
598 *Plant journal : for cell and molecular biology*, 9 (1996) 919-925.
- 599 [75] M.H. Park, Y. Suzuki, M. Chono, J.P. Knox, I. Yamaguchi, CsAGP1, a Gibberellin-Responsive Gene  
600 from Cucumber Hypocotyls, Encodes a Classical Arabinogalactan Protein and Is Involved in Stem  
601 Elongation, *PLANT PHYSIOLOGY*, 131 (2003) 1450-1459.

- 602 [76] Y. Suzuki, M. Kitagawa, J.P. Knox, I. Yamaguchi, A role for arabinogalactan proteins in gibberellin-  
603 induced alpha-amylase production in barley aleurone cells., *The Plant journal : for cell and*  
604 *molecular biology*, 29 (2002) 733-741.
- 605 [77] W.-Y. Liu, Y.-M. Chang, S.C.-C. Chen, C.-H. Lu, Y.-H. Wu, M.-Y.J. Lu, D.-R. Chen, A.C.-C. Shih, C.-R.  
606 Sheue, H.-C. Huang, C.-P. Yu, H.-H. Lin, S.-H. Shiu, M. Sun-Ben Ku, W.-H. Li, Anatomical and  
607 transcriptional dynamics of maize embryonic leaves during seed germination, *Proceedings of the*  
608 *National Academy of Sciences*, 110 (2013) 3979-3984.
- 609 [78] D.X. Zhou, C. Bisanz-Seyer, R. Mache, Molecular cloning of a small DNA binding protein with  
610 specificity for a tissue-specific negative element within the rps1 promoter., *Nucleic acids research*,  
611 23 (1995) 1165-1169.
- 612 [79] D. Alabadí, J. Gallego-Bartolomé, L. Orlando, L. García-Cárcel, V. Rubio, C. Martínez, M. Frigerio, J.M.  
613 Iglesias-Pedraz, A. Espinosa, X.W. Deng, M.A. Blázquez, Gibberellins modulate light signaling  
614 pathways to prevent Arabidopsis seedling de-etiolation in darkness, *The Plant Journal*, 53 (2007)  
615 324-335.
- 616 [80] D. Alabadí, J. Gil, M.A. Blázquez, J.L. García-Martínez, Gibberellins Repress Photomorphogenesis in  
617 Darkness, *PLANT PHYSIOLOGY*, 134 (2004) 1050-1057.
- 618 [81] C. Trapnell, A. Roberts, L. Goff, G. Pertea, D. Kim, D.R. Kelley, H. Pimentel, S.L. Salzberg, J.L. Rinn, L.  
619 Pachter, Differential gene and transcript expression analysis of RNA-seq experiments with TopHat  
620 and Cufflinks., *Nature protocols*, 7 (2012) 562-578.
- 621 [82] T. Tian, Y. Liu, H. Yan, Q. You, X. Yi, Z. Du, W. Xu, Z. Su, agriGO v2.0: a GO analysis toolkit for the  
622 agricultural community, 2017 update, *Nucleic Acids Research*, 45 (2017) W122-W129.
- 623 [83] F. Supek, M. Bošnjak, N. Škunca, T. Šmuc, REVIGO summarizes and visualizes long lists of gene  
624 ontology terms., *PloS one*, 7 (2011) e21800.
- 625 [84] J. Wu, X. Mao, T. Cai, J. Luo, L. Wei, KOBAS server: a web-based platform for automated annotation  
626 and pathway identification, *Nucleic Acids Research*, 34 (2006) W720-W724.
- 627 [85] J. Jin, F. Tian, D.-C. Yang, Y.-Q. Meng, L. Kong, J. Luo, G. Gao, PlantTFDB 4.0: toward a central hub for  
628 transcription factors and regulatory interactions in plants, *Nucleic Acids Research*, 45 (2017) D1040-  
629 D1045.

630

631

632

633 **FIGURES**

634

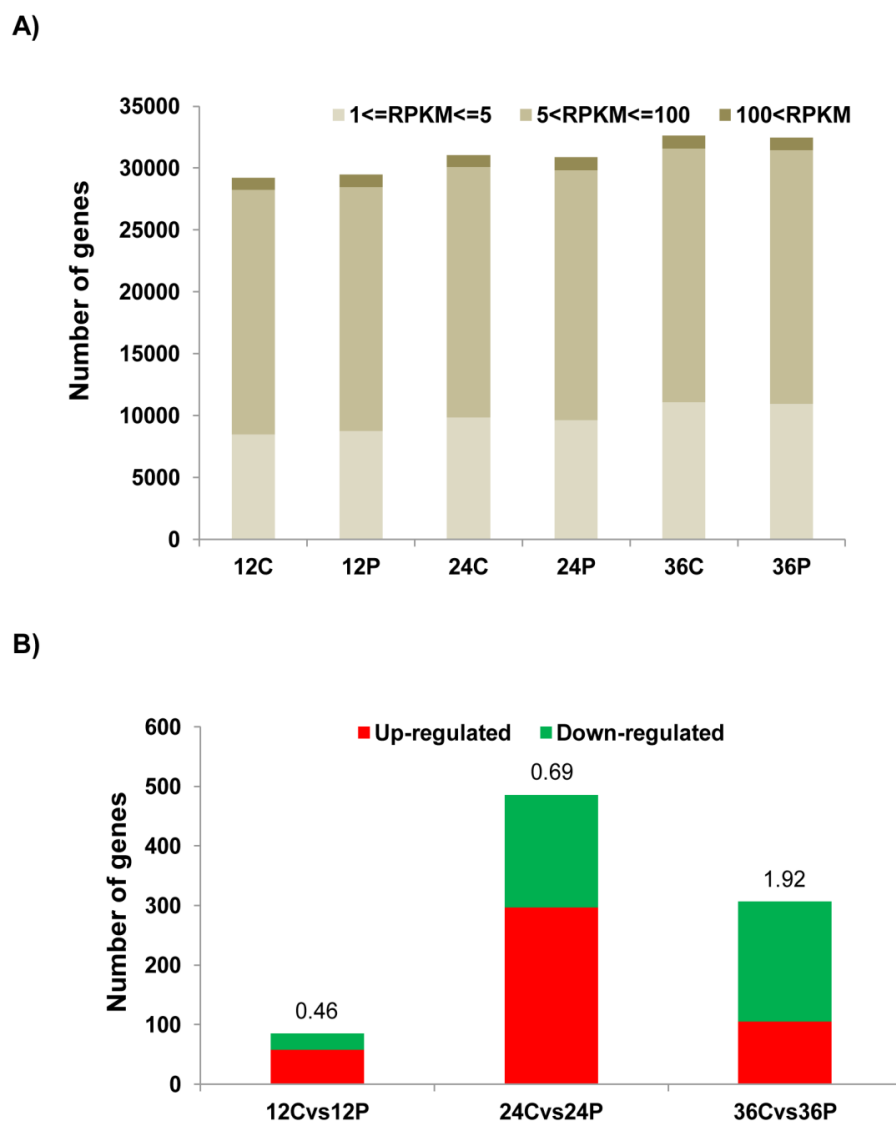

635

636 **Figure 1. Gene expression profiling during seed germination. A)** Number of expressed genes  
637 (RPKM  $\geq$  1) and their estimated expression levels in each sample. **B)** Number of DEGs at 12, 24  
638 and 36 HAI. Numbers above the vertical bars stand for the ratio between down- and up-  
639 regulated genes. In the x-axis labels, C and P stand for control and PBZ, respectively.

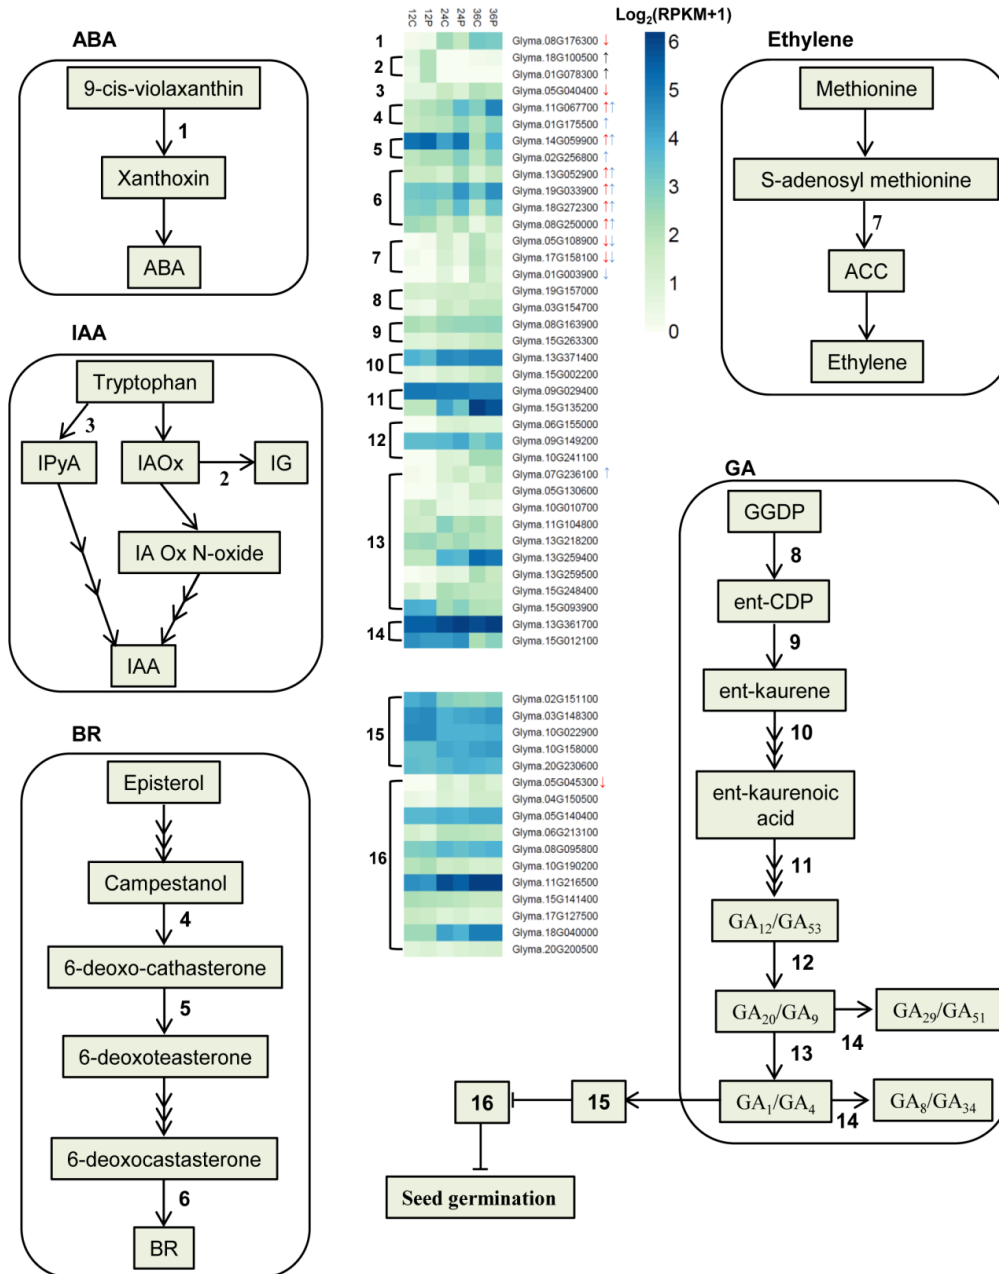

640

641 **Figure 2. Hormone biosynthesis pathways.** Some GA deactivation and signaling genes  
 642 discussed are also included. Up- and down-regulated genes are shown with up and down  
 643 arrows. Black, red and blue arrows represent differential expression at 12, 24 and 36 HAI,  
 644 respectively. Genes without arrows are expressed in at least one condition, although not  
 645 included by our statistical thresholds. Genes are numbered as follows: 1) nine-cis-  
 646 epoxy-carotenoid dioxygenase 3 (*NCED3*); 2) *SUR2*; 3) tryptophan aminotransferase related 2  
 647 (*TAR2*); 4) *DWARF4* (*DWF4*); 5) *DWARF3* (*DWF3*); 6) brassinosteroid-6-oxidase 2 (*BR6ox2*); 7) 1-  
 648 amino-cyclopropane-1-carboxylate synthase (*ACS*); 8) ent-copalyl diphosphate synthase (*CPS*);

649 9) ent-kaurene synthase (*KS*); 10) ent-kaurene oxidase (*KO*); 11) ent-kaurenoic acid oxidase  
650 (*KAO*); 12) GA 20-oxidase (*GA20ox*); 13) GA 3-oxidase (*GA3ox*); 14) GA 2-oxidase (*GA2ox*); 15)  
651 GIBBERELLIN INSENSITIVE DWARF1 (*GID1*) [*Glyma.02G151100* (*GID1b1*), *Glyma.10G022900*  
652 (*GID1b2*), *Glyma.03G148300* (*GID1b3*), *Glyma.10G158000* (*GID1c1*) and *Glyma.20G230600*  
653 (*GID1c2*); 16) DELLA. Abbreviations: Abscisic Acid (*ABA*), indole-3-pyruvic acid (*IPyA*), Indol-3-  
654 acetaldoxime (*IAOx*), Indol-3-acetaldoxime N-oxide (*IA Ox N-oxide*), indole glucosinolates (*IG*),  
655 Indole-3-acetic acid (*IAA*), Brassinosteroid (*BR*), 1-aminocyclopropane-1-carboxylic acid (*ACC*),  
656 geranyl geranyl diphosphate (*GGDP*), ent-copalyl diphosphate (*ent-CDP*).

657

658

659

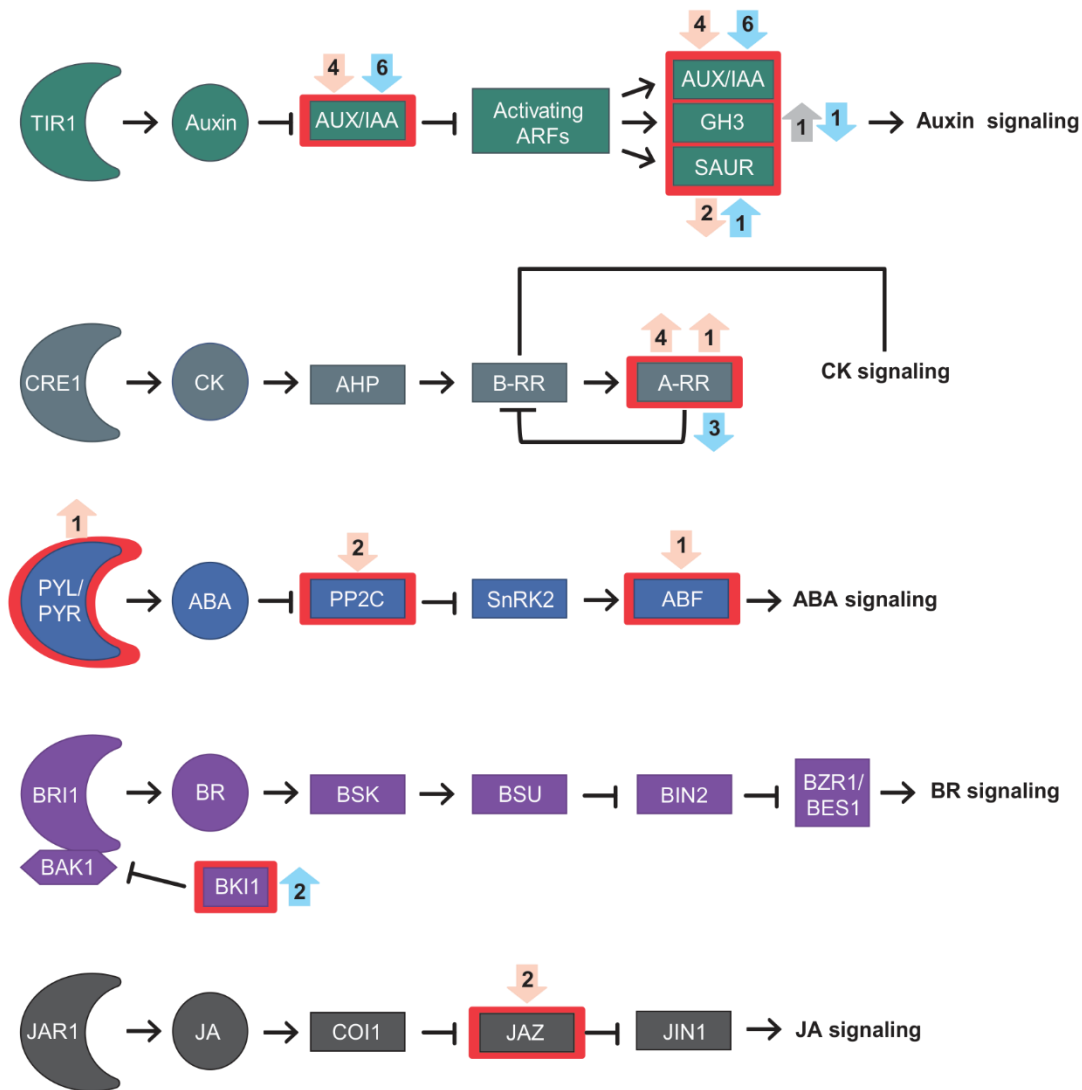

660

661 **Figure 3. Hormone signal transduction.** Rectangles with red lines represent gene families with  
 662 at least one DEG. Up and down arrows represent PBZ up- and down-regulated genes. Number  
 663 of DEGs are shown in circles adjacent to the red rectangles. Grey, light orange and light blue  
 664 arrows represent DEGs at 12, 24 and 36 HAI, respectively. Abbreviations: transport inhibitor  
 665 response 1 (TIR1); Auxin/Indole-3-Acetic Acid (Aux/IAA); auxin-responsive Gretchen Hagen3  
 666 (GH3); small auxin upregulated RNA (SAUR); CYTOKININ RESPONSE 1 (CRE 1); Cytokinin (CK);  
 667 His-containing phosphotransfer protein (AHP) ;Type-B response regulator (B-RR); Type-A  
 668 response regulator (A-RR); Pyrabactin Resistance (PYR); PYR-like (PYL); Abscisic acid (ABA);  
 669 Protein Phosphatase 2C (PP2C); Sucrose non-fermenting 1-related protein kinases subfamily 2  
 670 (SnRK2s); Abscisic acid responsive element-binding factor (ABF); Brassinosteroid-insensitive 1



671 (BRI1); BRI1-associated receptor kinase 1 (BAK1); Brassinosteroid (BR); BRI1 kinase inhibitor  
672 (BK11); Brassinosteroid signaling kinases (BSK); BRI1-suppressor (BSU); brassinosteroid-  
673 insensitive 2 (BIN2); Brassinazole-resistant 1 (BZR1); BRI1-ethyl methanesulfonate-suppressor 1  
674 (BES1); JASMONATE RESISTANT1 (JAR1); Jasmonic acid (JA); Coronatine Insensitive1 (COI1);  
675 JASMONATE ZIM DOMAIN (JAZ); JASMONATE INSENSITIVE 1 (JIN1).

676

677

678

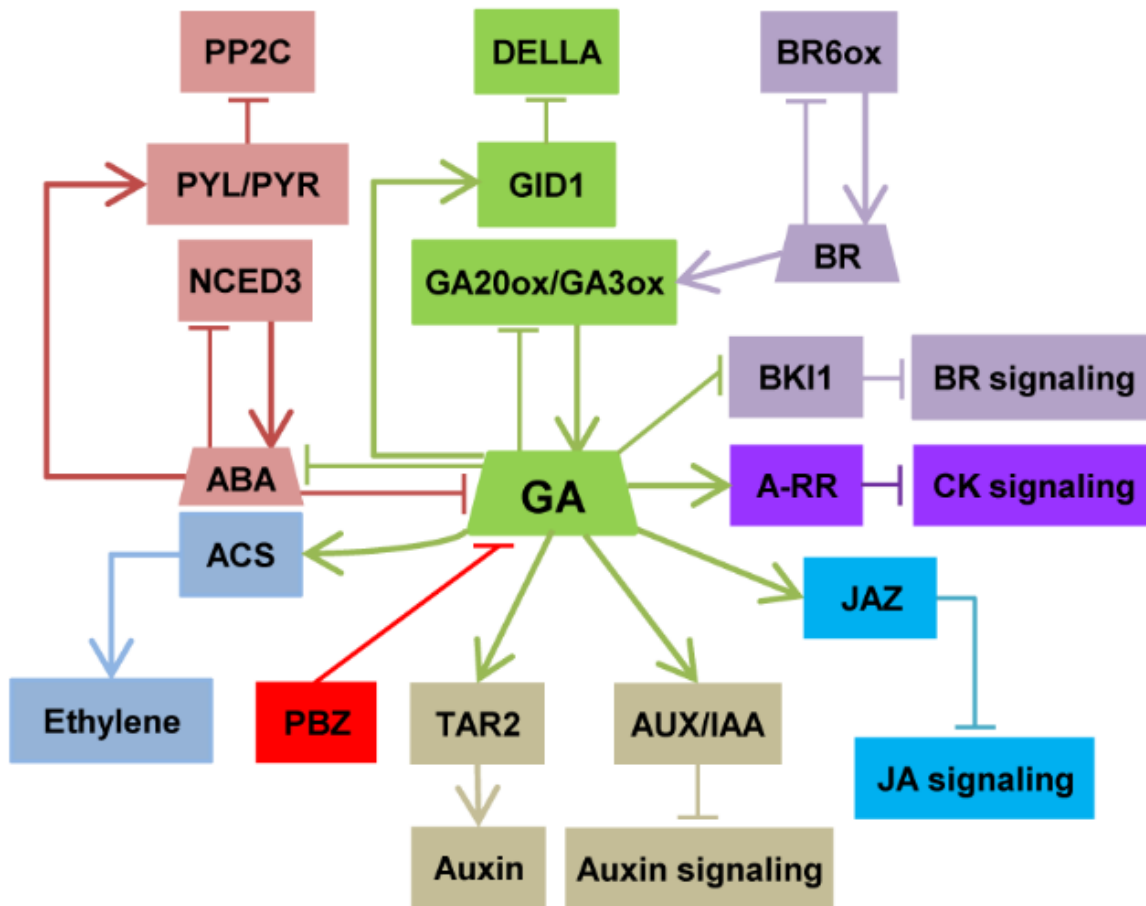

679

680 **Figure 4. Schematic model of hormonal crosstalk with gibberellin during *G. max* seed**  
 681 **germination.** The model was derived from a careful literature curation based on differentially  
 682 expressed genes discussed along the manuscript. Positive interactions are indicated by arrows  
 683 and T bars indicate repression. Abbreviations: Pyrabactin Resistance (PYR); PYR-like (PYL);  
 684 Protein Phosphatase 2C (PP2C); Nine-cis-epoxycarotenoid dioxygenase 3 (NCED3); Abscisic acid  
 685 (ABA); Aminocyclopropane-1-carboxylic acid synthase (ACS); Paclobutrazol (PBZ); Gibberellin  
 686 (GA); GIBBERELLIN INSENSITIVE DRAWF 1 (GID1); GA 20-oxidase (GA20ox); GA 3-oxidase  
 687 (GA3ox); Tryptophan aminotransferases 2 (TAR2); Auxin/Indole-3-Acetic Acid (AUX/IAA);  
 688 Brassinosteroid (BR); BR 6-oxidase (BR6ox); BRI1 kinase inhibitor (BKI1); Type-A response  
 689 regulator (A-RR); JASMONATE ZIM DOMAIN (JAZ); Jasmonic acid (JA).

690

691

692

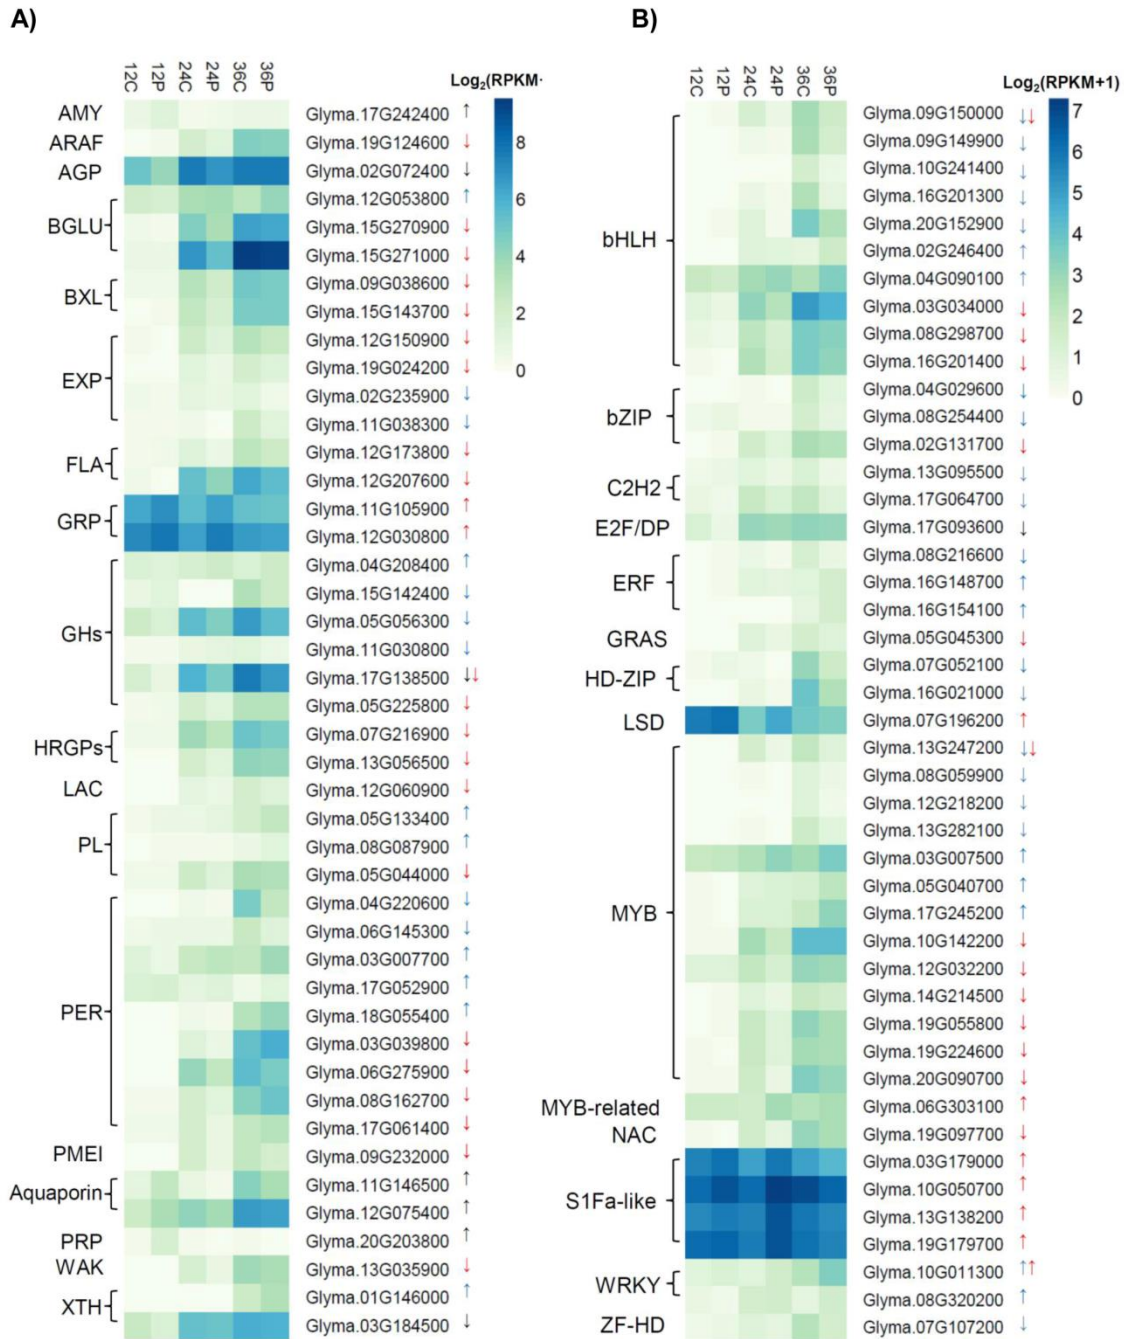

693

694 **Figure 5. Genes encoding differentially expressed cell-wall remodeling enzymes (A) and**  
 695 **transcription factors (B).** Up- and down-regulated genes are shown with up and down arrows.  
 696 Black, red and blue arrows represent DEGs at 12, 24 and 36 HAI, respectively. Abbreviations:  
 697 alpha amylase-like (AMY); alpha-L-arabinofuranosidase (ARAF); arabinogalactan protein (AGP);  
 698 beta glucosidase (BGLU); beta-xylosidase (BXL); expansin (EXP); FASCICLIN-like arabinogalactan-  
 699 protein (FLA); glycine-rich protein (GRP); Glycosyl hydrolase family protein (GH);  
 700 hydroxyproline-rich glycoprotein family protein (HRGP); laccase (LAC); Pectin lyase-like

701 superfamily protein (PL); Peroxidase superfamily protein (PER); pectin methylesterase inhibitor  
702 superfamily protein (PMEI); proline-rich protein (PRP); wall associated kinase (WAK); xyloglucan  
703 endotransglucosylase/hydrolase (XTH); basic helix-loop-helix (bHLH); Basic Leucine Zipper (bZIP)  
704 ; C2H2 zinc finger (C2H2); Ethylene response factor (ERF); GRAS (gibberellin insensitive (GAI),  
705 Repressor of ga1-3 (RGA), SCARECROW-LIKE 3 (SCR) gene family; Homeodomain-leucine zipper  
706 (HD-ZIP); LESION SIMULATING DISEASE (LSD); Myelobastosis (MYB); Zinc finger Homeodomain  
707 (ZF-HD); No apical meristem (NAM), ATAF, and CUC (cup-shaped cotyledon) (NAC) family.

708
